## ANNOUNCEMENT

### CRITICAL CARE MEDICINE EXAMINATION

The American Board of Anesthesiology (ABA) will administer a written examination in CRITICAL CARE MEDICINE on Saturday, September 18, 1999. To qualify for examination, applicants must be an ABA diplomate by the fall of 1999 and meet the Board's training and other entrance requirements. The ABA *Booklet of Information* and application may be requested by writing to the Secretary, American Board of Anesthesiology, 4101 Lake Boone Trail, Suite 510, Raleigh, North Carolina 27607-7506. The application itself may be downloaded from the ABA Web site ([WWW.ABANES.ORG](http://WWW.ABANES.ORG)). The ABA must receive completed applications by March 1, 1999.
